# Supplementary material
Source: PubMed Central journal article supplement (PMC7882658)
Supplement: 13205_2020_2634_MOESM1_ESM.pdf [file 13205_2020_2634_MOESM1_ESM.pdf]

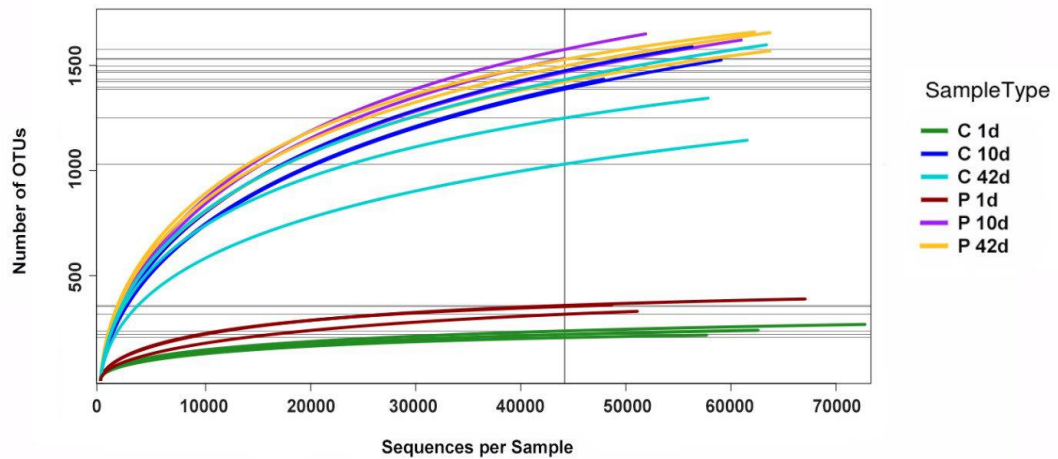

**S1 Fig. Rarefaction curves of sequence data. OTUs were defined at 97% similarity cutoff. The figure depicts the comparison between cecal communities of control (C) and probiotic (P) birds. The breaking line was place at 44,174 reads, to rarefy and compare OTUs across samples. C 1d, C 10d and C 42d correspond to – control group birds on days 1, 10 and 42, respectively. P 1d, P 10d and P 42d refer to probiotic group birds on days 1, 10 and 42, accordingly.**
