# Supplementary material
Source: PubMed Central journal article supplement (PMC7882658)
Supplement: 13205_2020_2634_MOESM4_ESM.pdf [file 13205_2020_2634_MOESM4_ESM.pdf]

**S2 Table Estimated diversity indices for the C- and P- groups during growth**

| Index   | 1 day             |                   | 10 day            |                   | 42 day             |                    |
|---------|-------------------|-------------------|-------------------|-------------------|--------------------|--------------------|
| Group   | C                 | P                 | C                 | P                 | C                  | P                  |
| Chao    | 278.67±<br>35.92  | 415.00±<br>17.09  | 1961.33±<br>57.35 | 1991.33±<br>68.19 | 1748.00±<br>281.51 | 1933.67±<br>108.00 |
| Shannon | 3.16±0.04         | 3.20±0.30         | 6.01±0.11         | 6.06±0.19         | 5.72±0.35          | 6.81±0.40          |
| Simpson | 0.7427±<br>0.0017 | 0.7507±<br>0.0356 | 0.9368±<br>0.0032 | 0.9257±<br>0.0105 | 0.9121±<br>0.0166  | 0.9498±<br>0.0217  |
